# Supplementary material for: A Novel Controlled Fabrication of Hexagonal Boron Nitride Incorporated Composite Granules Using the Electrostatic Integrated Granulation Method
Source: MDPI journal article supplement (doi:10.3390/nano13010199), 2023-01-02
Supplement: s1 [file s1]

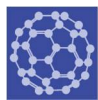

Supplementary Information

# A Novel Controlled Fabrication of Hexagonal Boron Nitride Incorporated Composite Granules Using the Electrostatic Integrated Granulation Method

Taisei Nakazono <sup>1</sup>, Atsushi Yokoi <sup>2</sup>, Wai Kian Tan <sup>2,\*</sup>, Go Kawamura <sup>1</sup>, Atsunori Matsuda <sup>1</sup> and Hiroyuki Muto <sup>1,2,\*</sup>

<sup>1</sup> Department of Electrical and Electronics Information Engineering, Toyohashi University of Technology, Toyohashi 441-8580, Aichi, Japan

<sup>2</sup> Institute of Liberal Arts and Sciences, Toyohashi University of Technology, Toyohashi 441-8580, Aichi, Japan

\* Correspondence: tan@las.tut.ac.jp (W.K.T.); muto@ee.tut.ac.jp (H.M.)

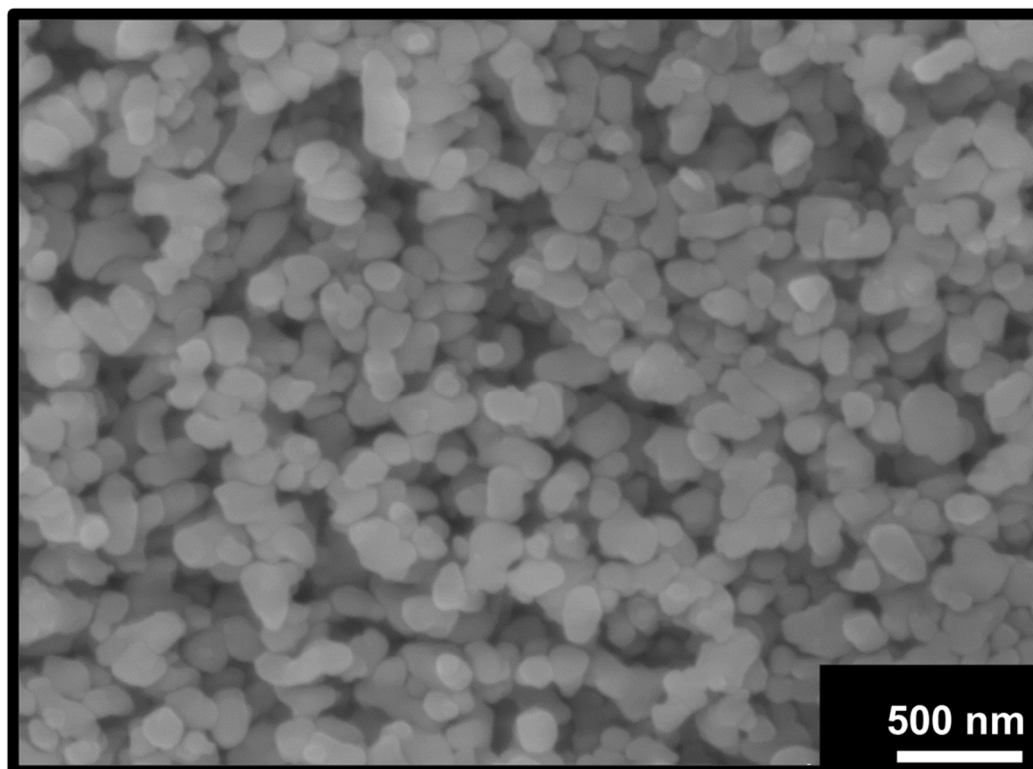

**Figure S1.** SEM image of an  $\text{Al}_2\text{O}_3$  core region of a  $\text{Al}_2\text{O}_3$ -hBN CS composites granule indicating the presence of only  $\text{Al}_2\text{O}_3$  particles.

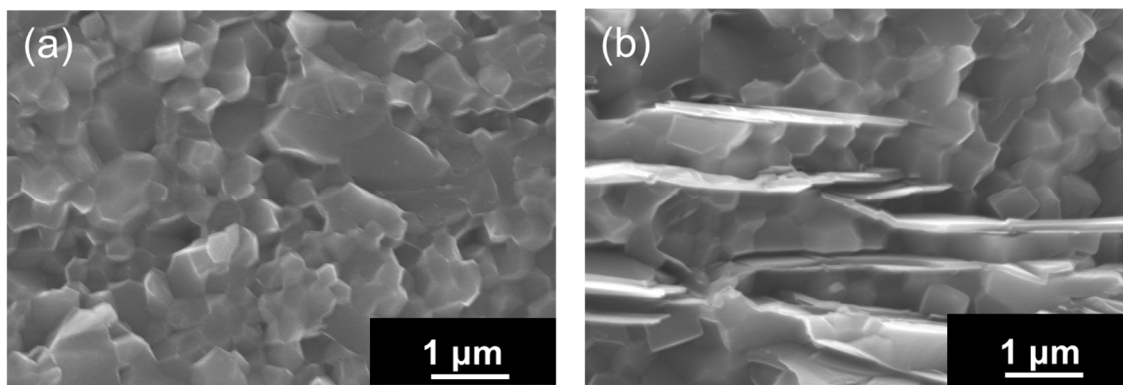

**Figure S2.** SEM images indicating the sintering of Al<sub>2</sub>O<sub>3</sub> particles at the (a) Al<sub>2</sub>O<sub>3</sub> core and (b) Al<sub>2</sub>O<sub>3</sub>-hBN composite shell regions.

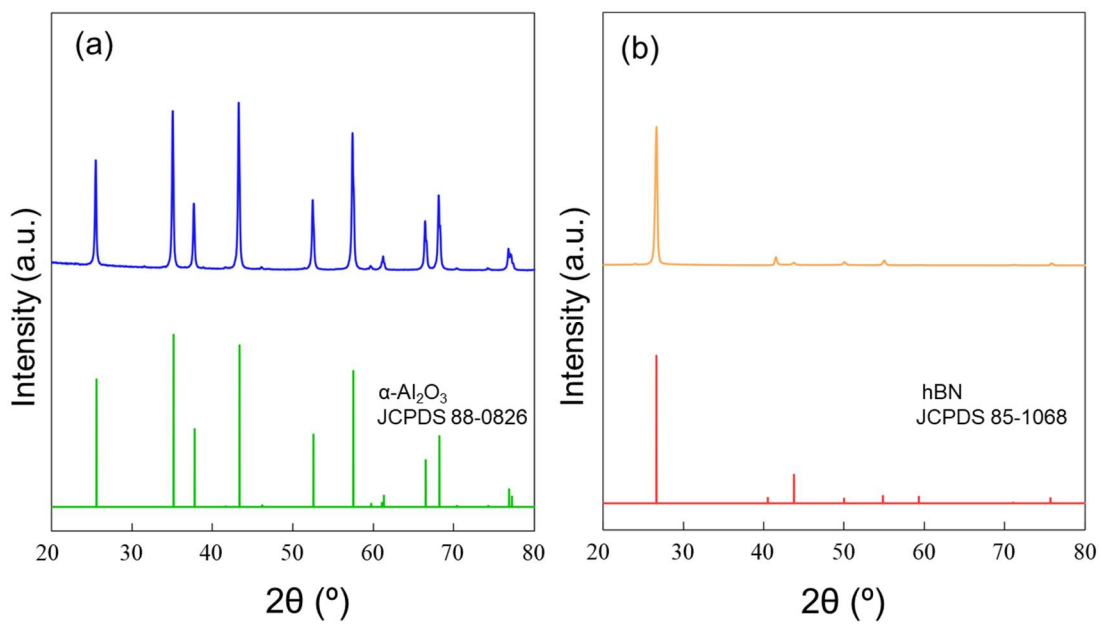

**Figure S3.** XRD patterns of the raw powders used. (a) Al<sub>2</sub>O<sub>3</sub> particles and (b) hBN sheets.
